# Supplementary material for: Diacylglycerol lipase alpha promotes hepatocellular carcinoma progression and induces lenvatinib resistance by enhancing YAP activity
Source: PubMed Central journal article supplement (PMC10325985; doi:10.1038/s41419-023-05919-5), 2023-07-06
Supplement: 41419_2023_5919_MOESM11_ESM.pdf [file 41419_2023_5919_MOESM11_ESM.pdf]

Original western blots

Figure 2A:

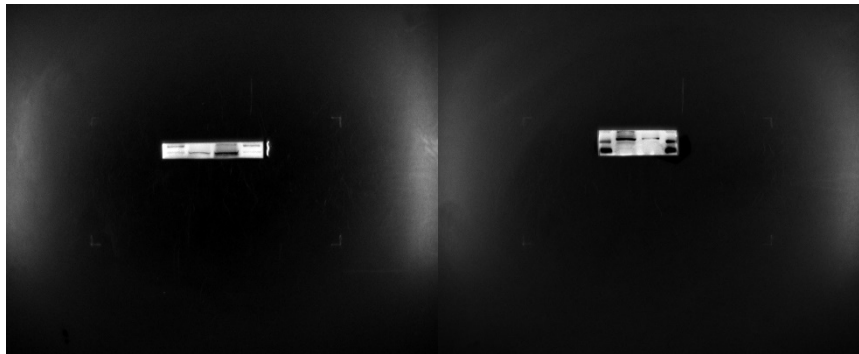

DAGLA 110KD

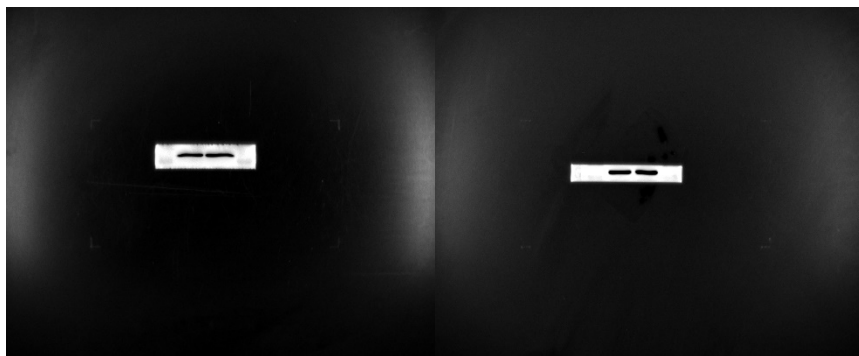

GAPDH 36KD

Figure S2B:

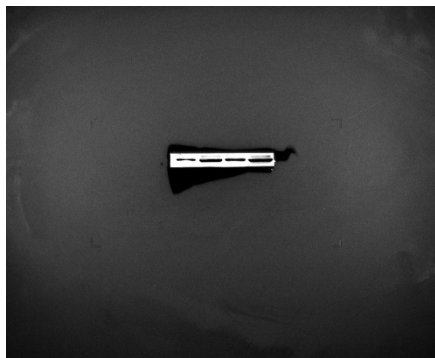

DAGLA 110KD

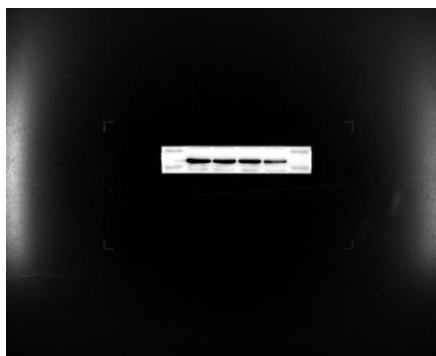

GAPDH 36KD

Figure 3F:

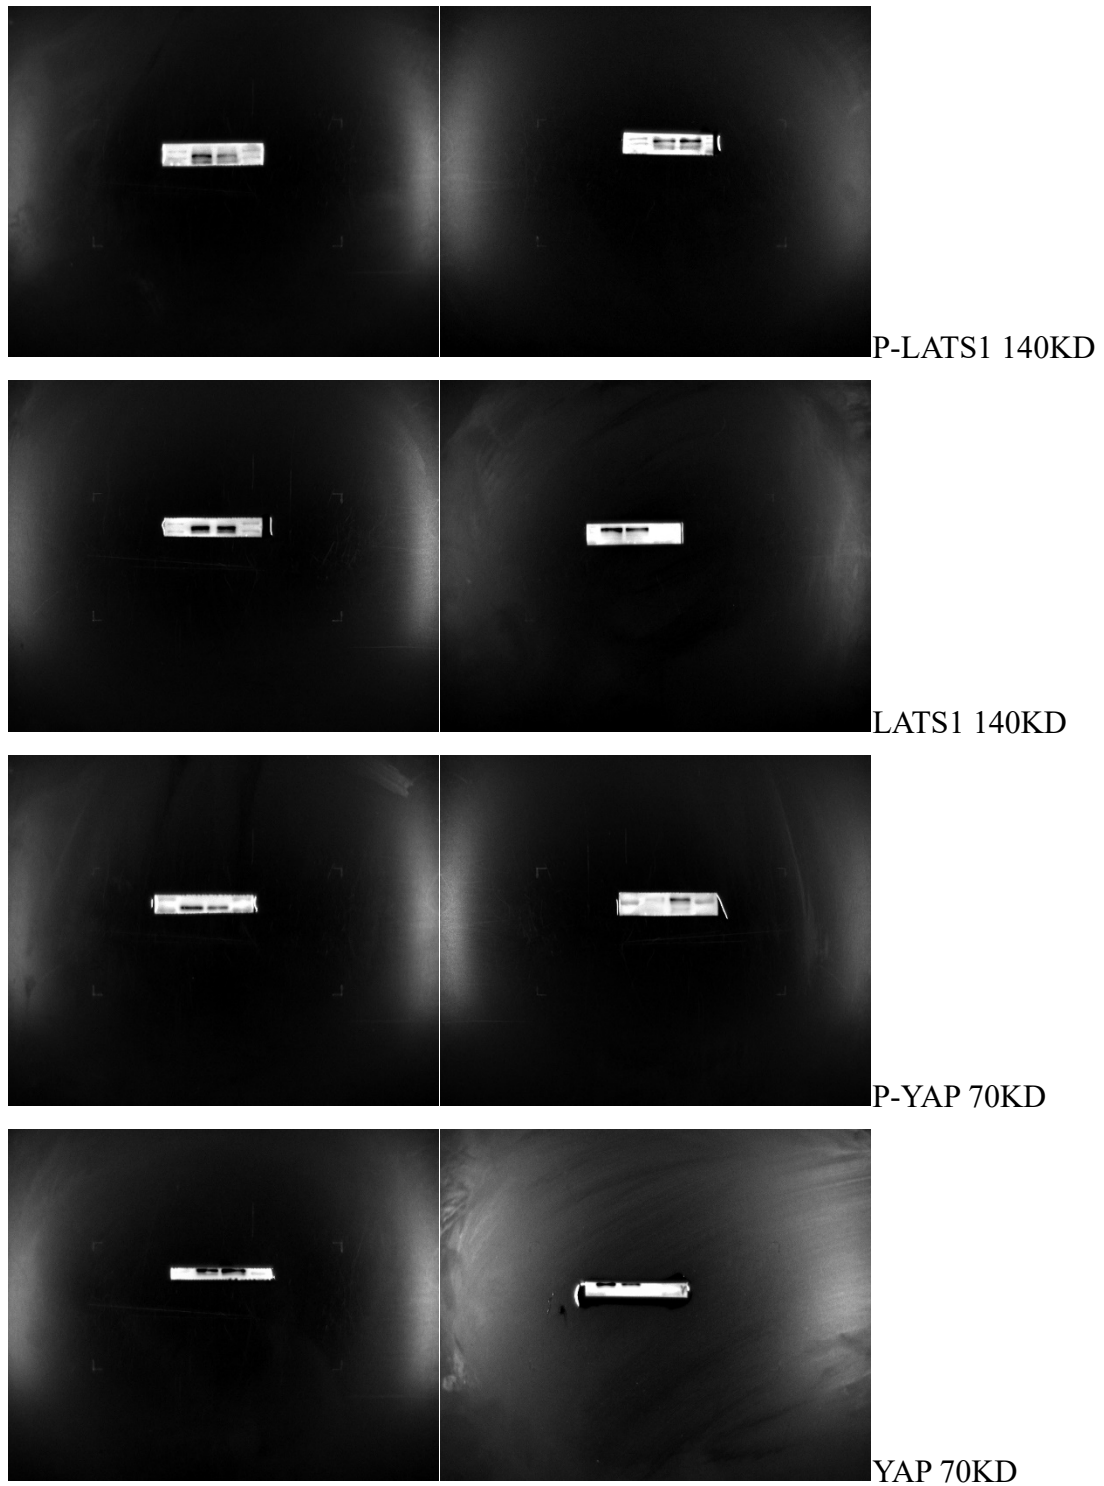

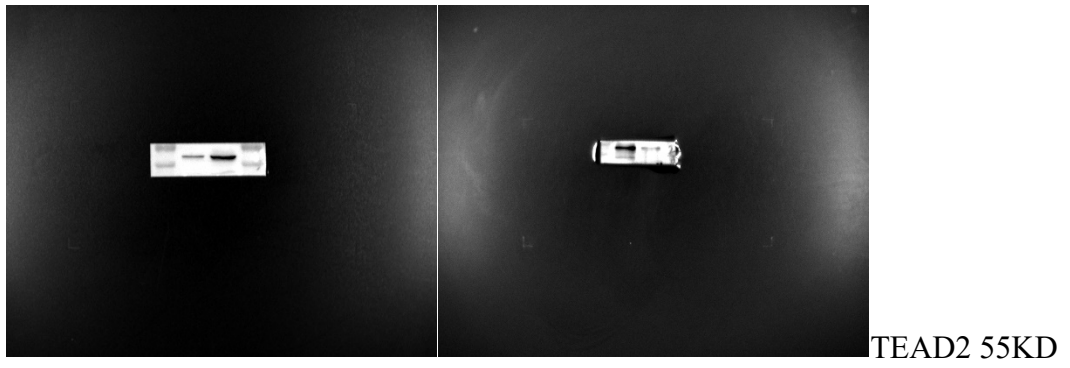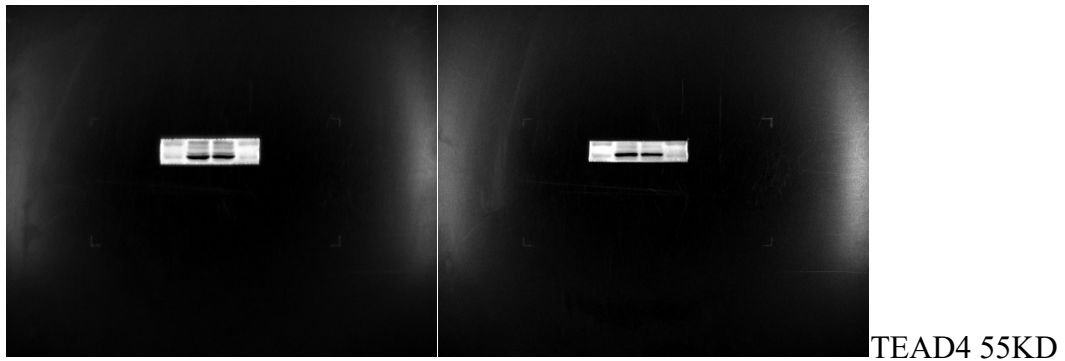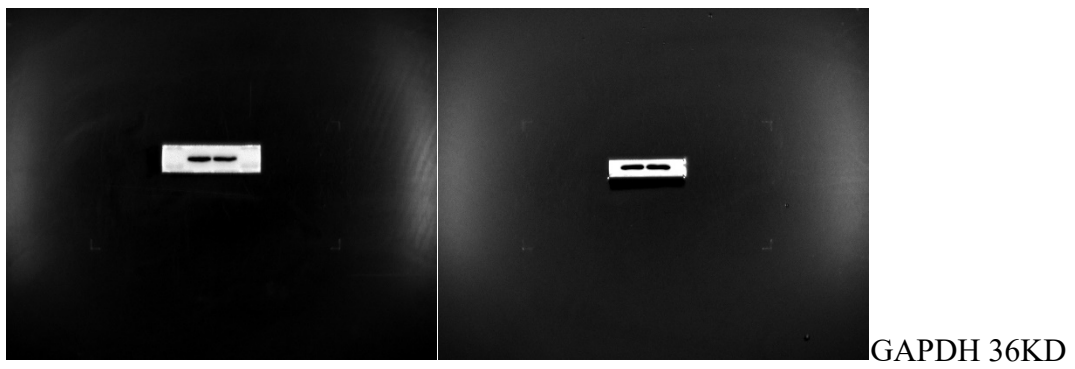

Figure 3G

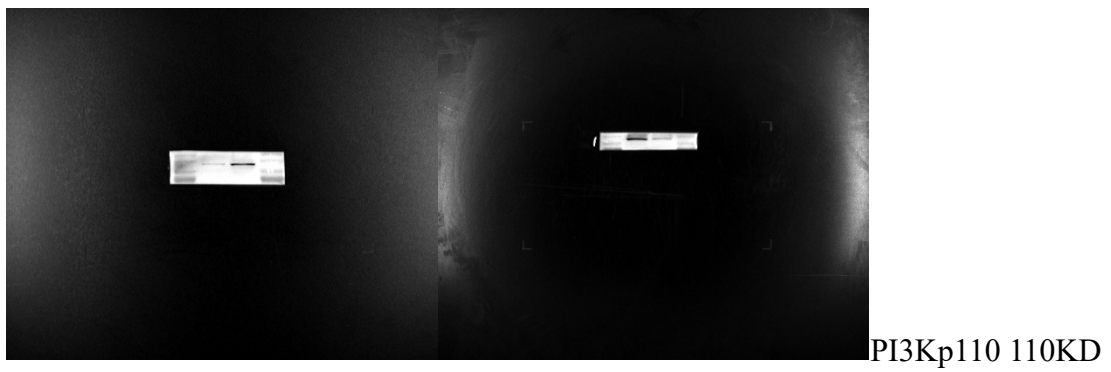

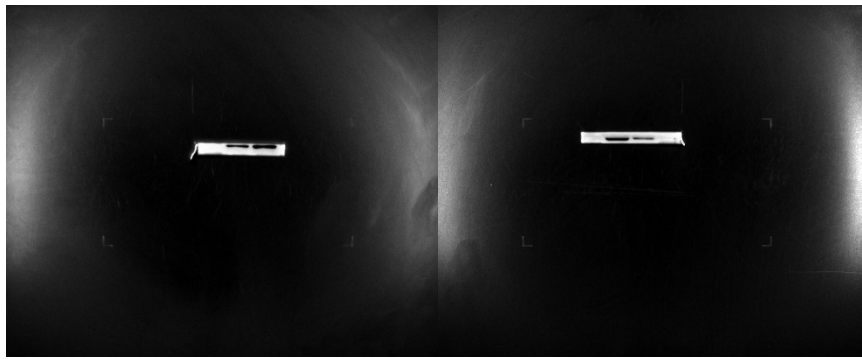

PI3K-p85 85KD

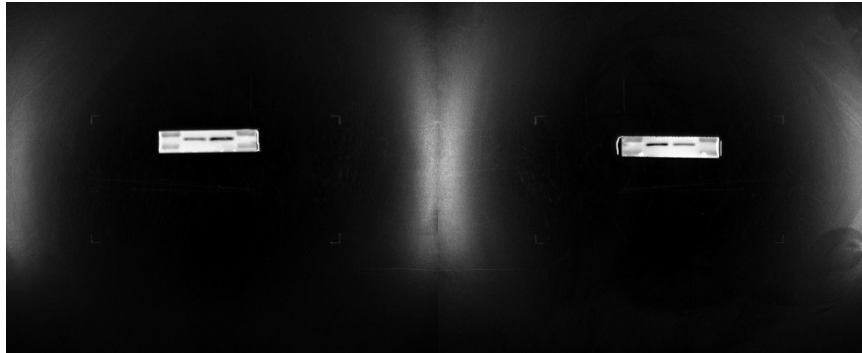

P-AKT 60KD

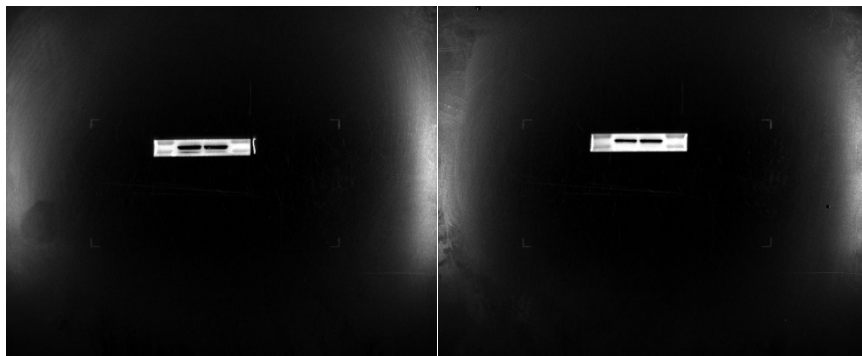

AKT 60KD

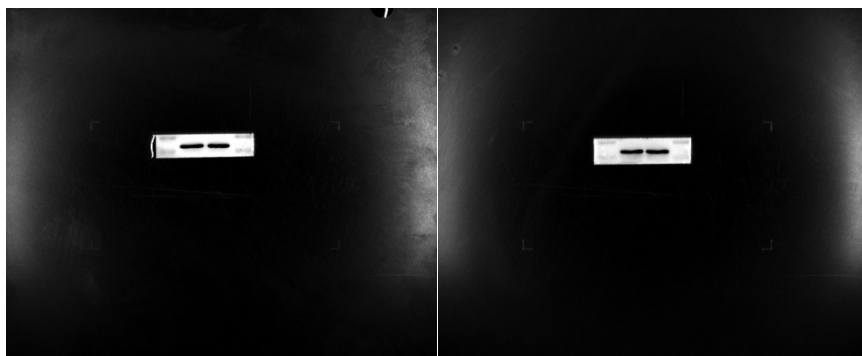

GAPDH 36KD

Figure 3H

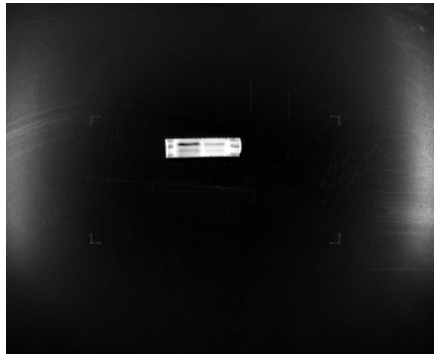

P-YAP 70KD

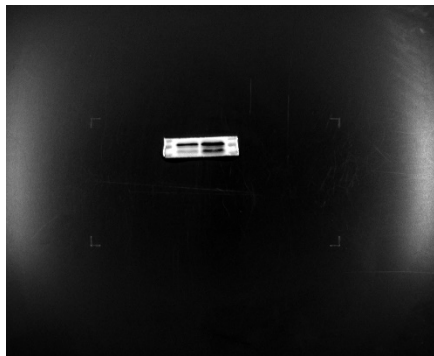

YAP 70KD

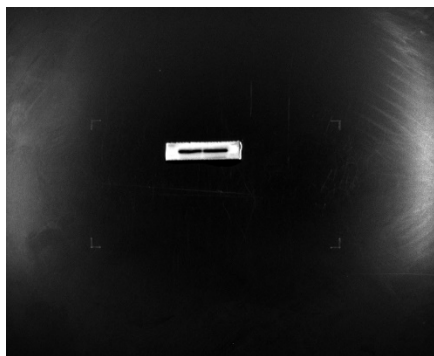

GAPDH 36KD

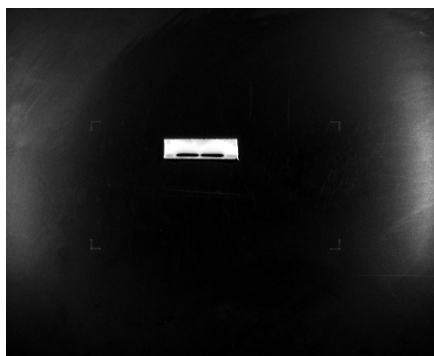

HistoneH3 17KD

Figure 3I

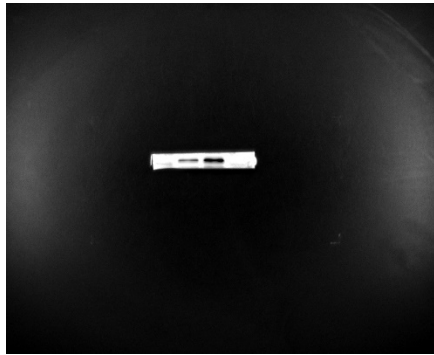

P-YAP 70KD

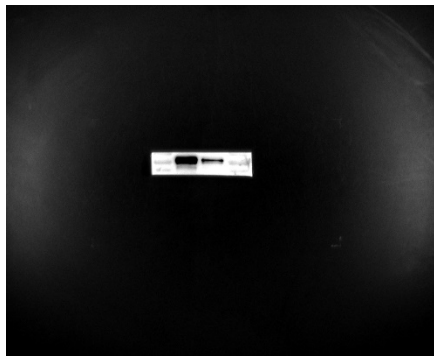

YAP 70KD

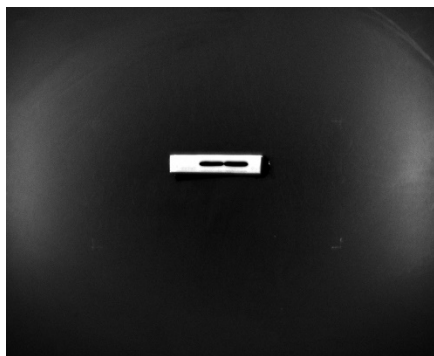

GAPDH 36KD

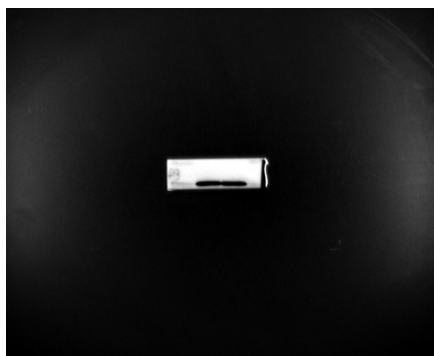

HistoneH3 17KD

Figure 3K

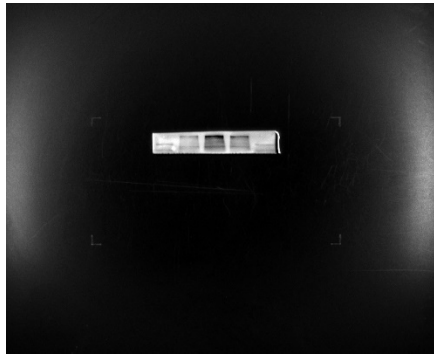

P-LATS1 140KD

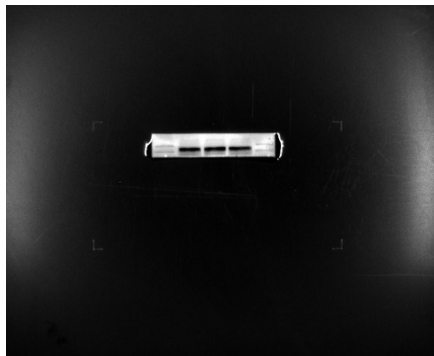

LATS1 140KD

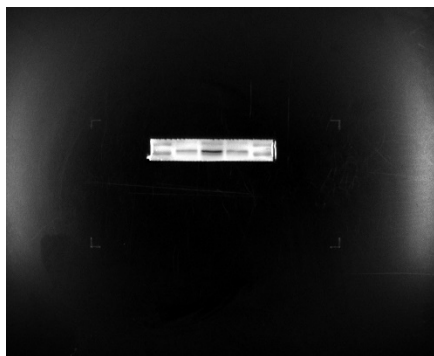

P-YAP 70KD

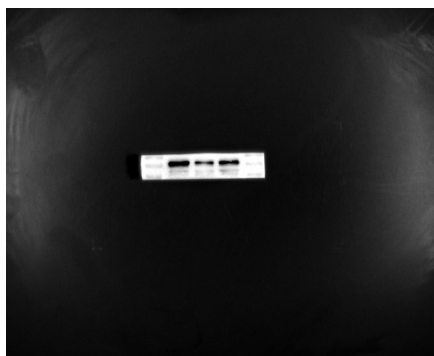

YAP 70KD

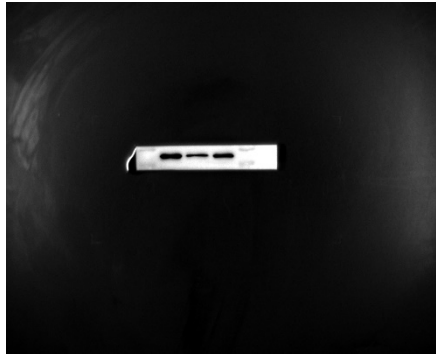

TEAD2 55KD

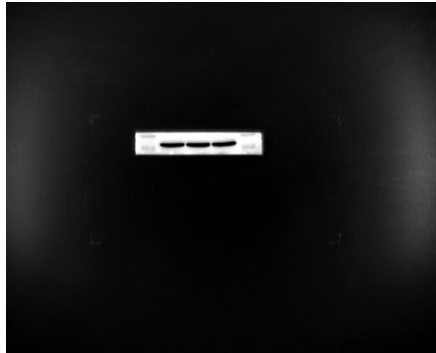

GAPDH 36KD

Figure 3L

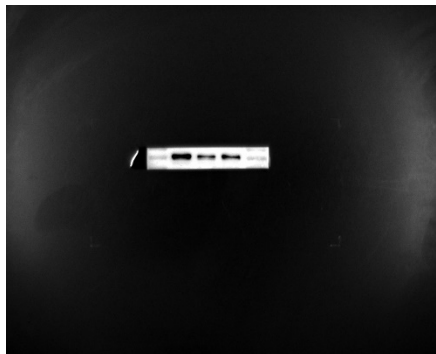

YAP 70KD

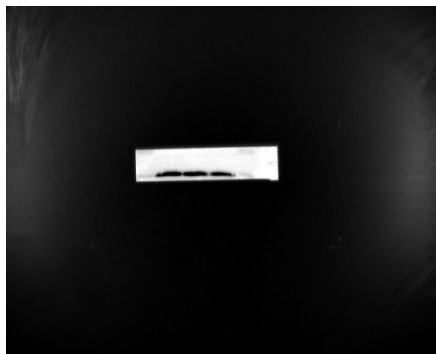

HistoneH3 17KD



Figure 3M

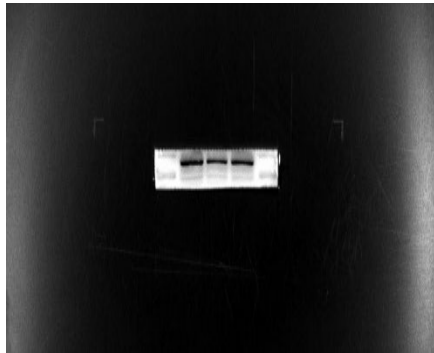

PI3Kp110 110KD

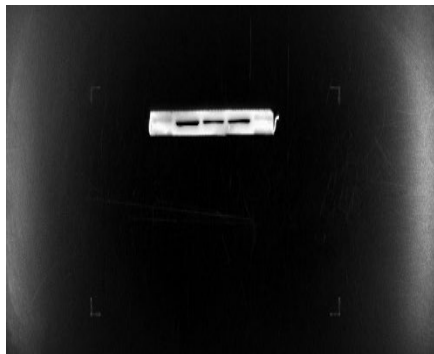

PI3K-p85 85KD

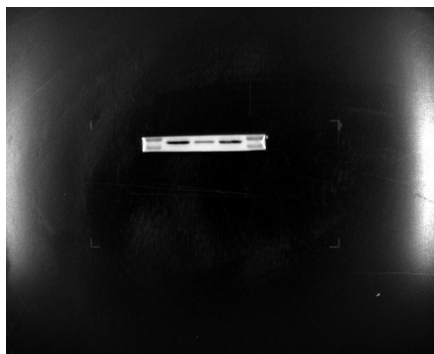

P-AKT 60KD

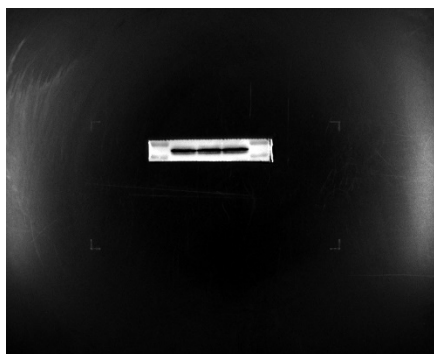

AKT 60KD

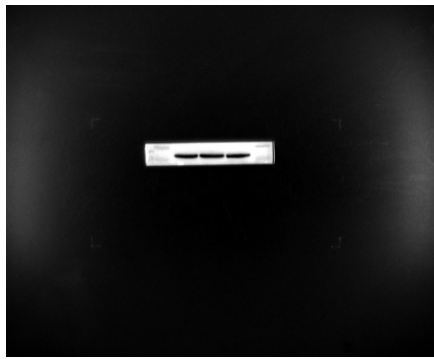

GAPDH 36KD

Figure 4C

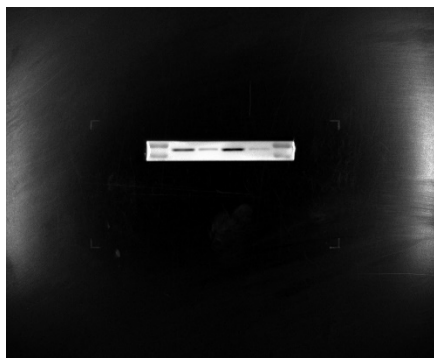

P-AKT 60KD

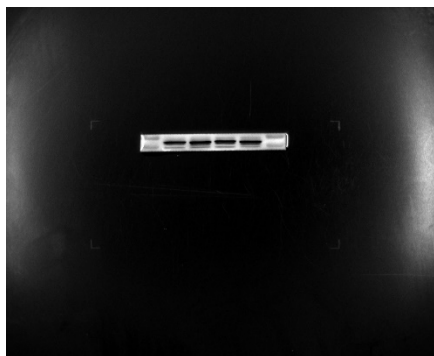

AKT 60KD

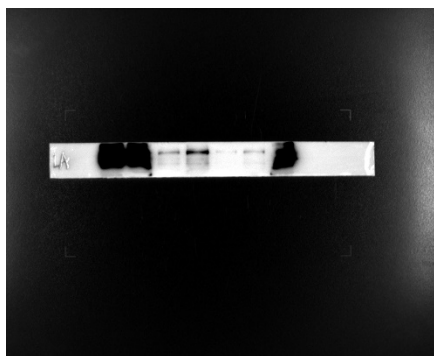

P-LATS1 140KD

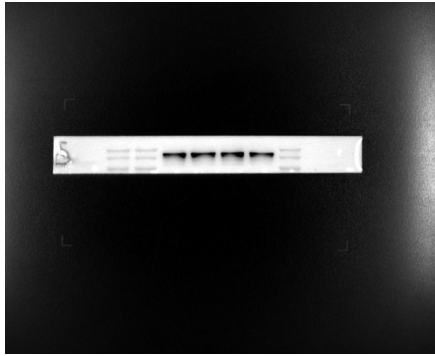

LATS1 140KD

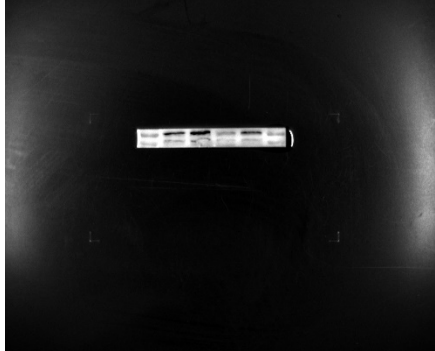

P-YAP 70KD

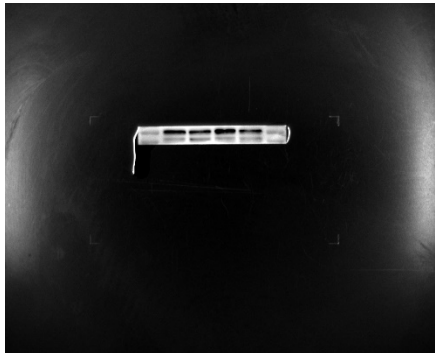

YAP 70KD

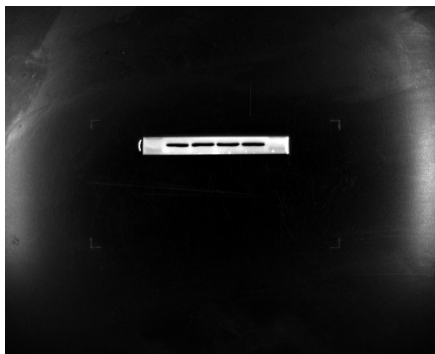

GAPDH 36KD

Figure 4E

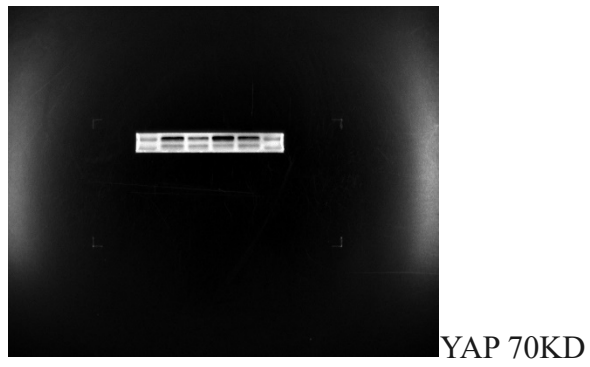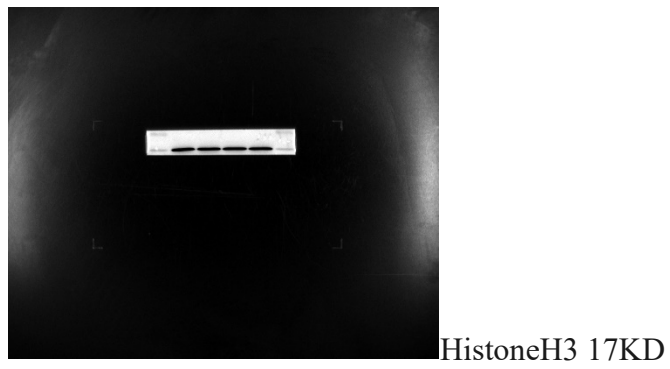

Figure 4F

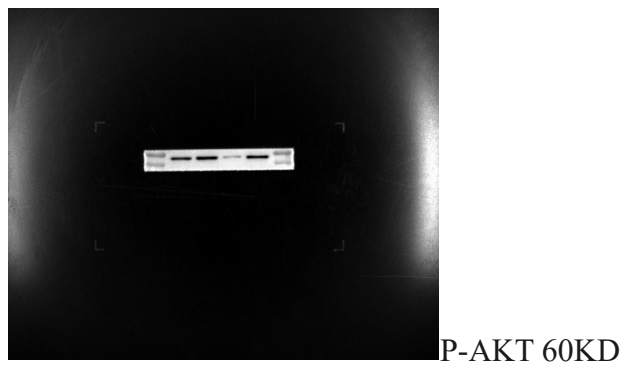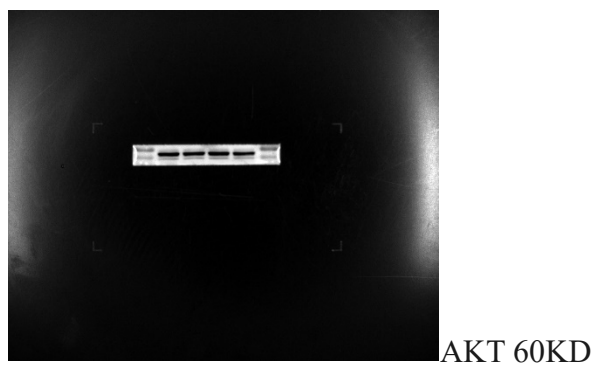

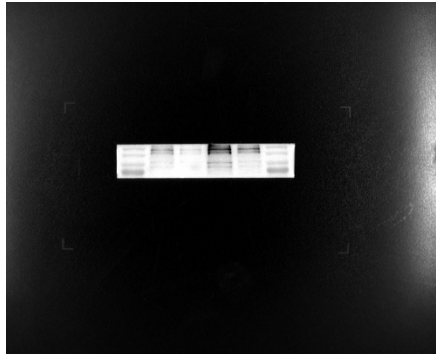

P-LATS1 140KD

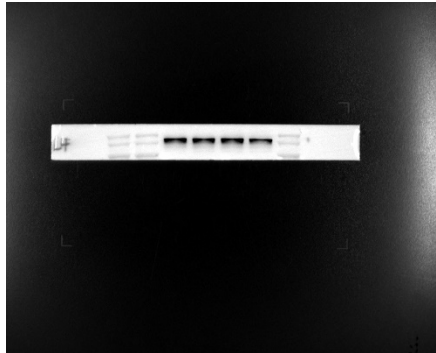

LATS1 140KD

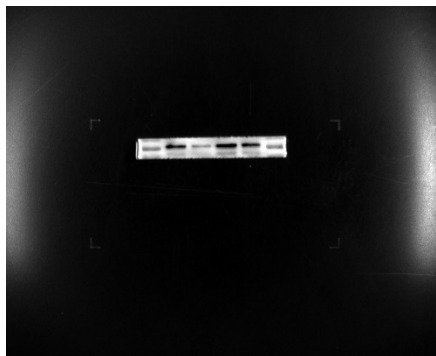

P-YAP 70KD

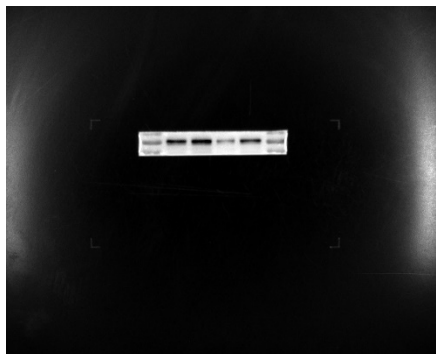

YAP 70KD

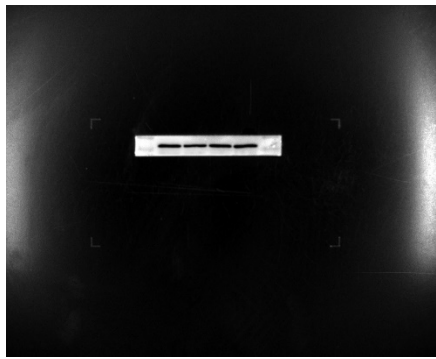

GAPDH 36KD

Figure 4G

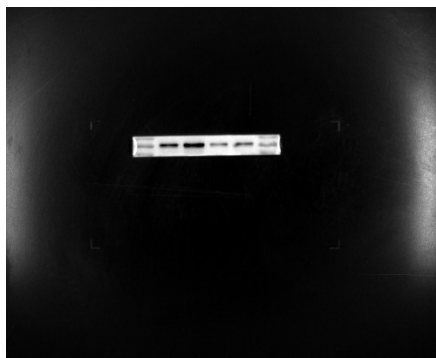

YAP 70KD

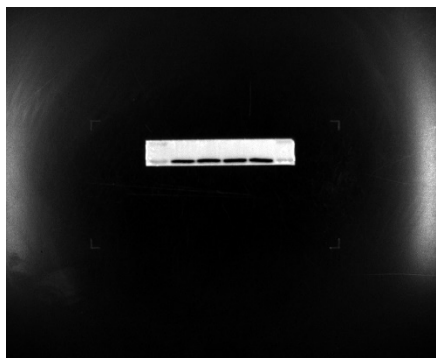

HistoneH3 17KD

Figure 4M

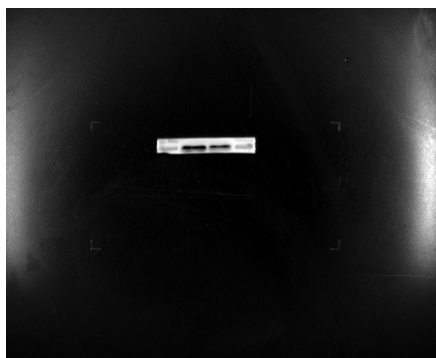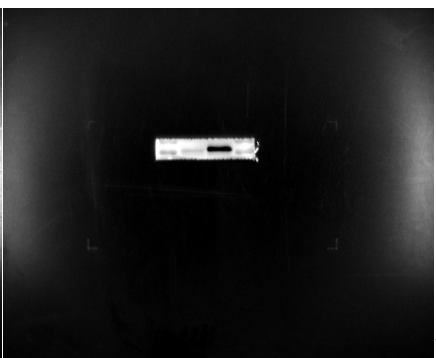

YAP 70KD

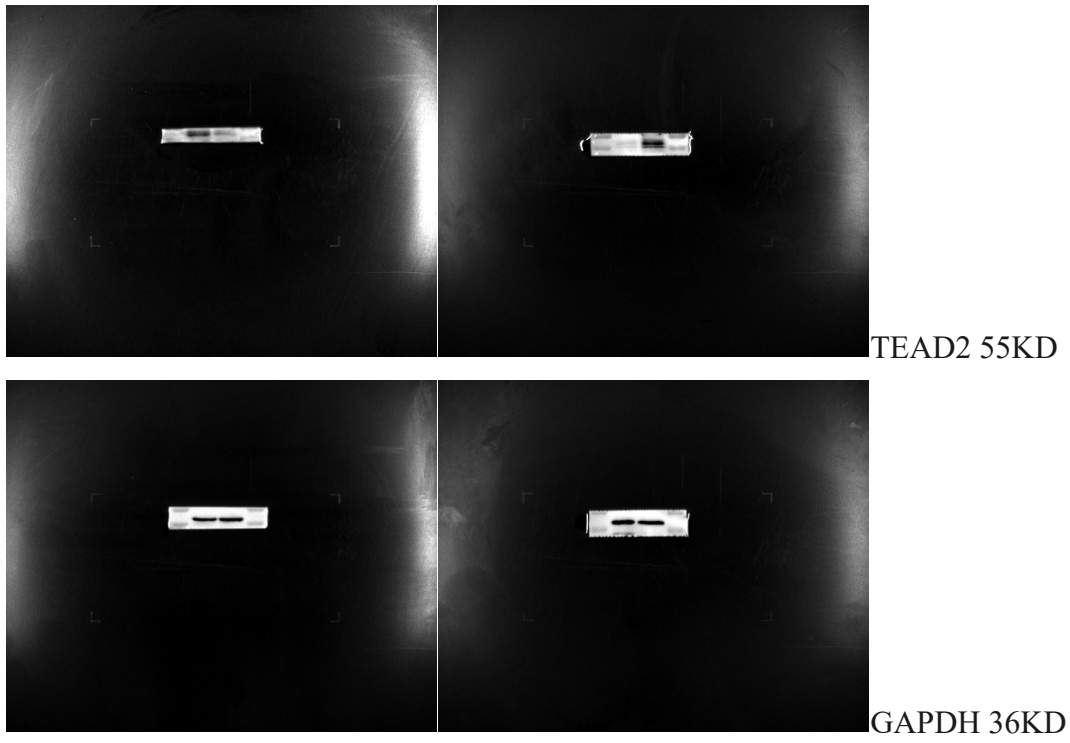

Figure 5H

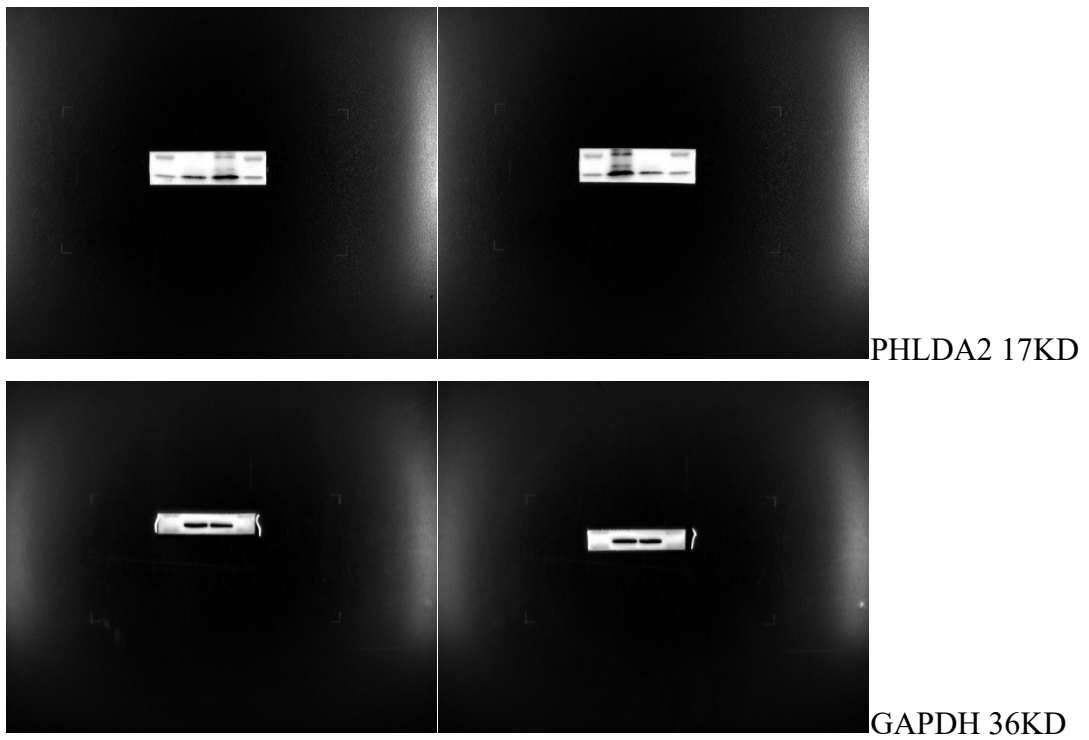

Figure 5I

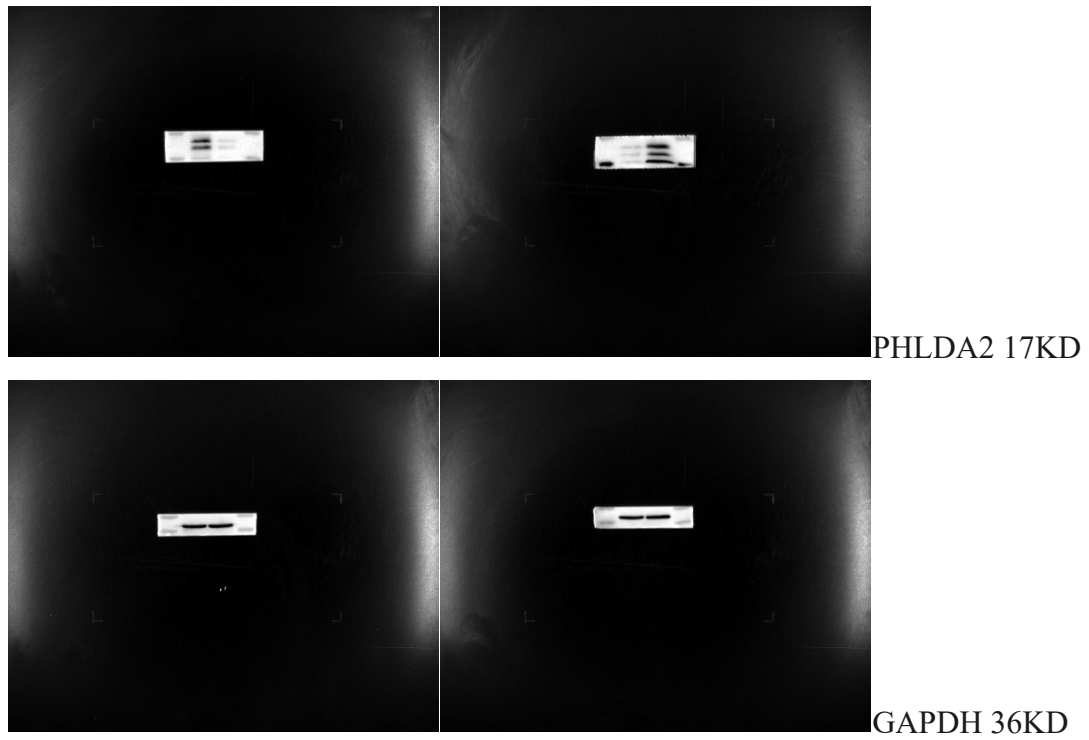

Figure 5J

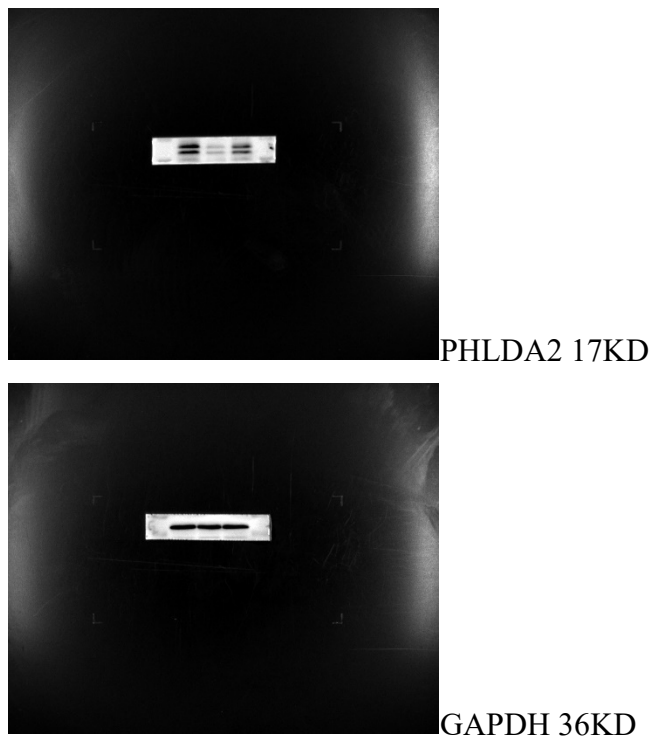



Figure 6F

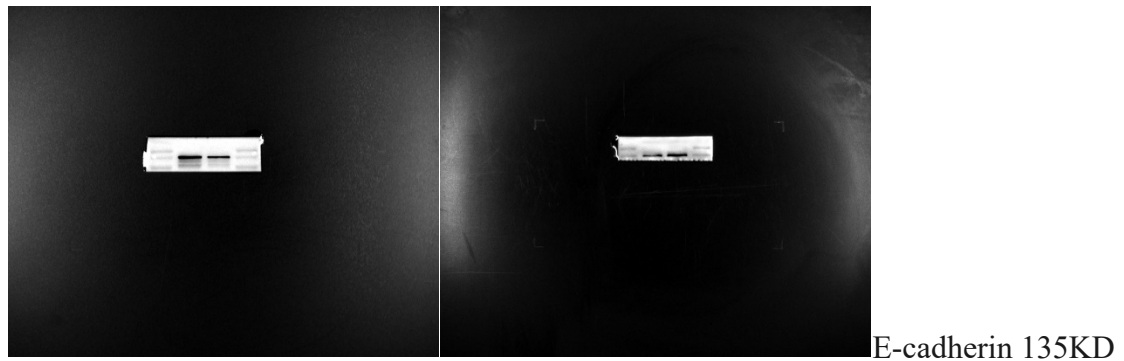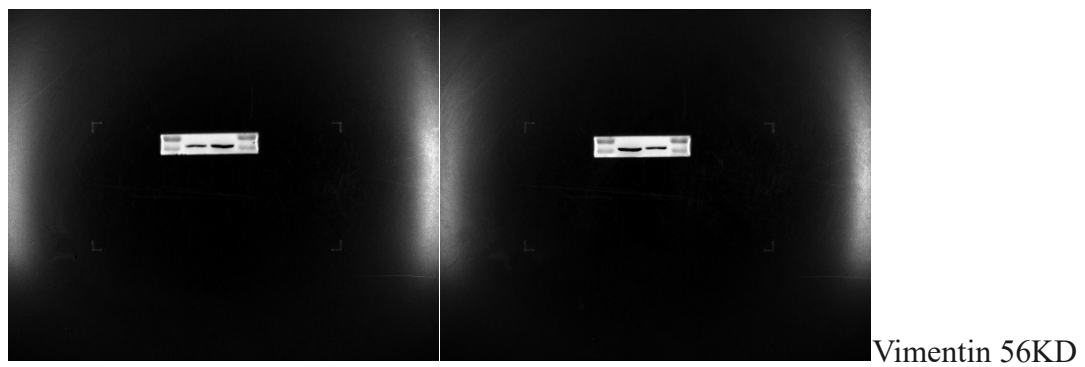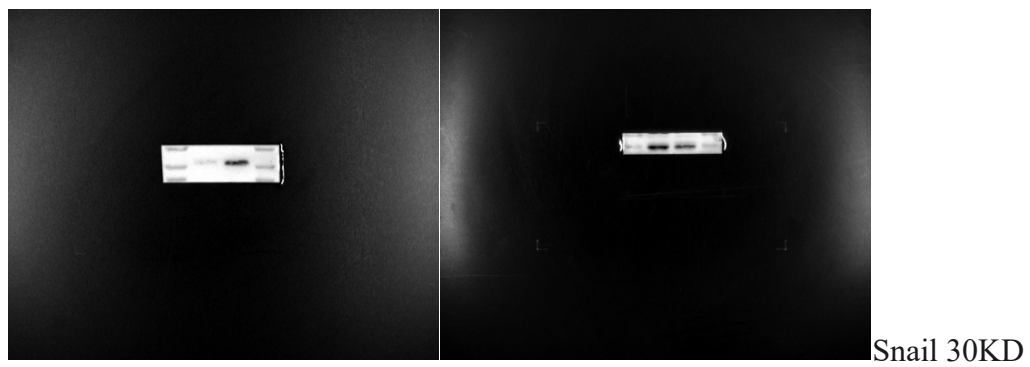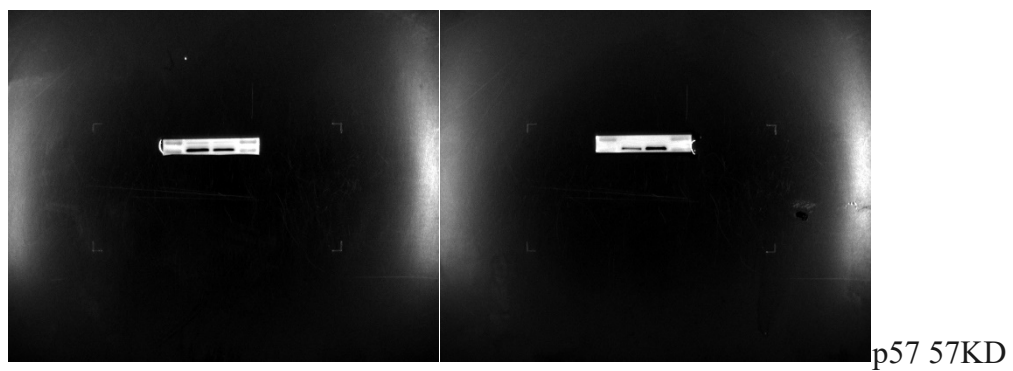

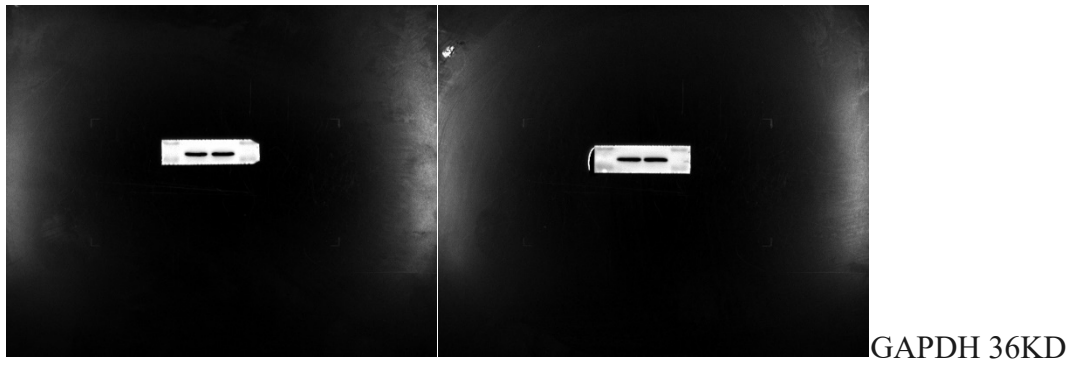

Figure 6G

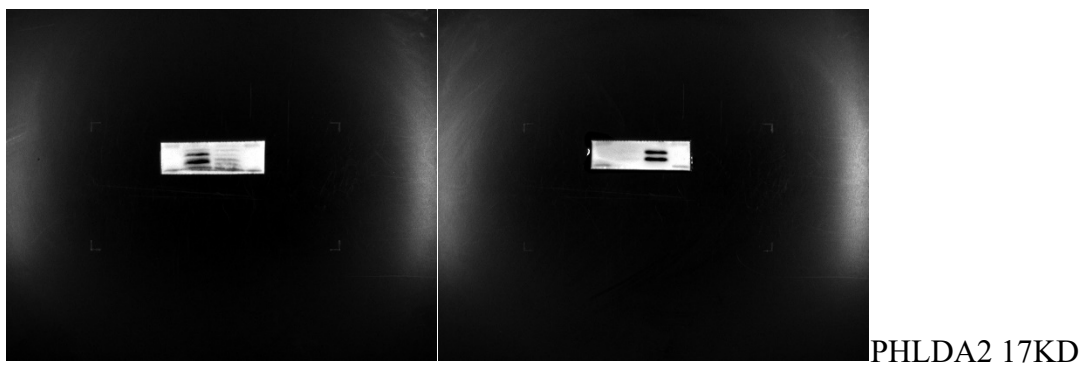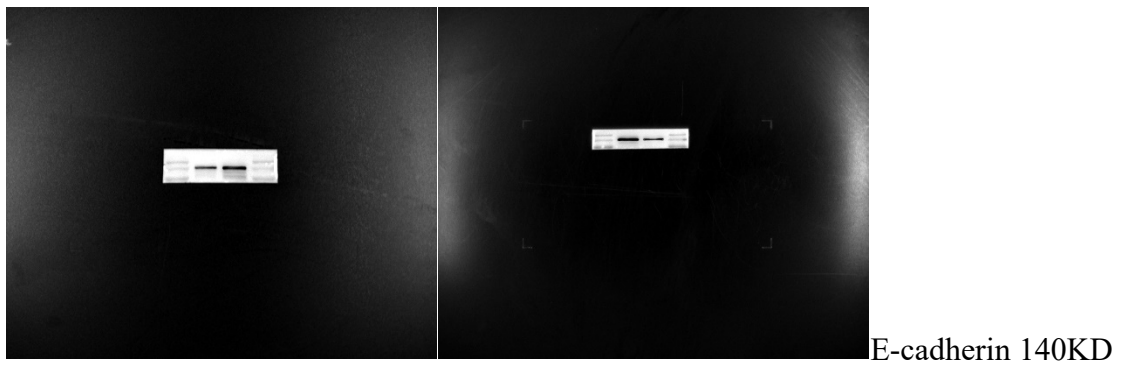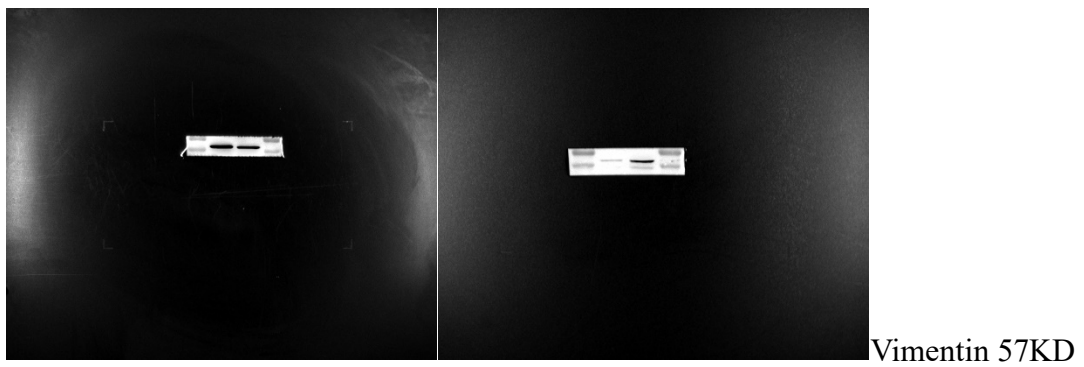

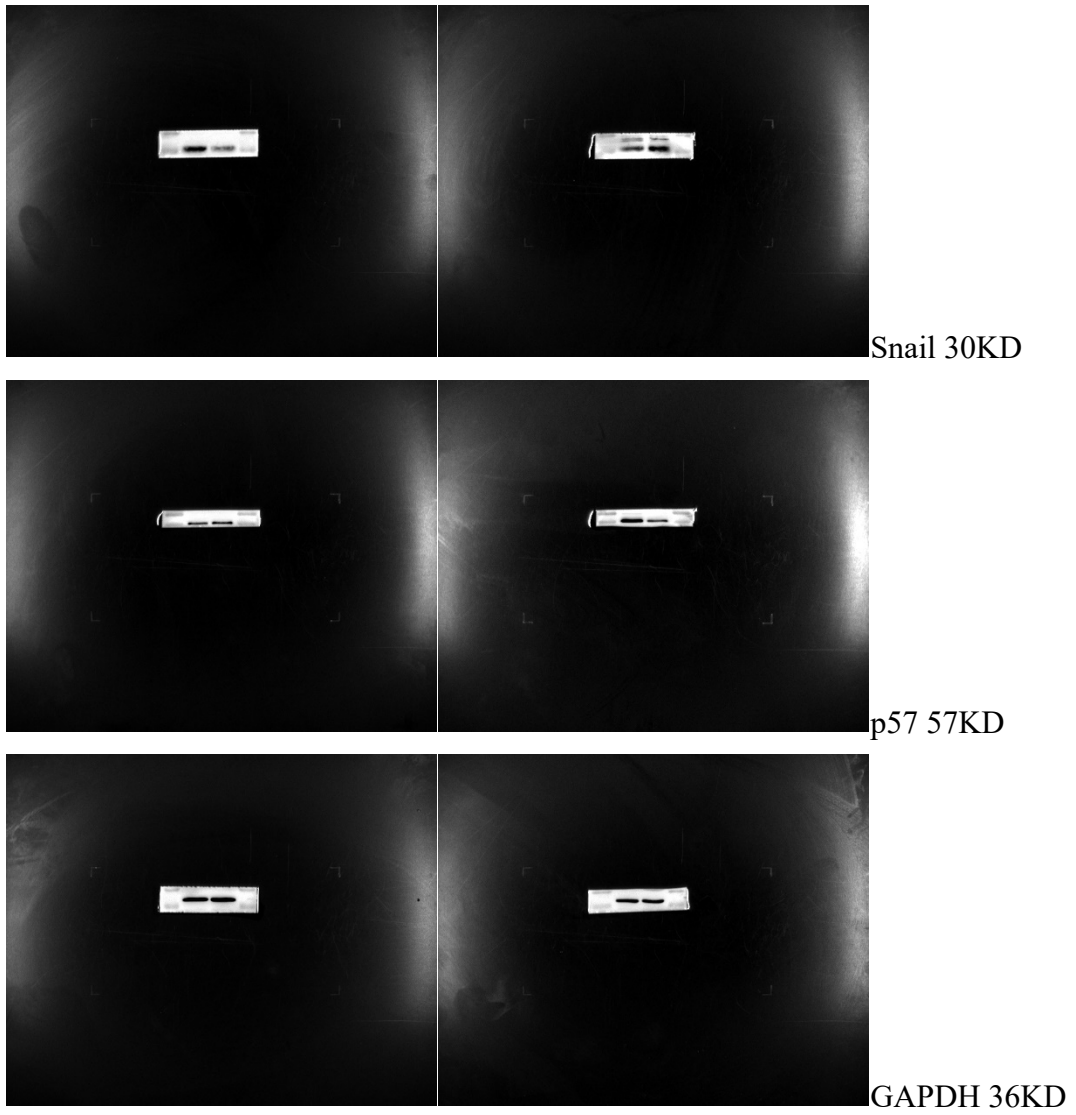

Figure 6H

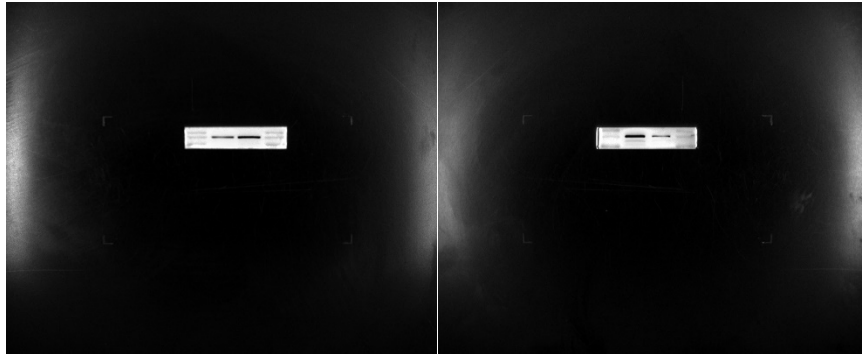

E-cadherin 135KD

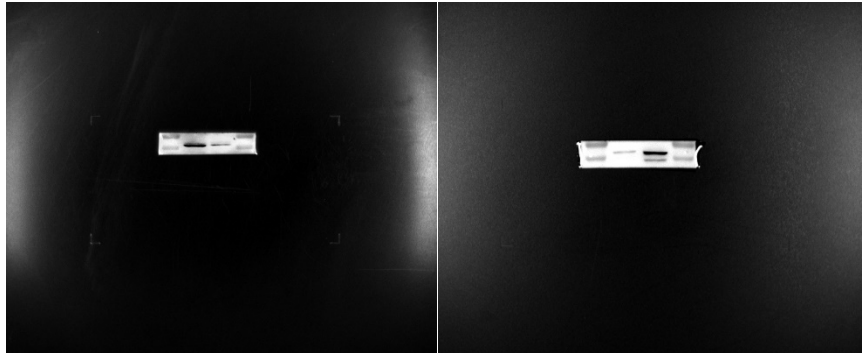

Vimentin 57KD

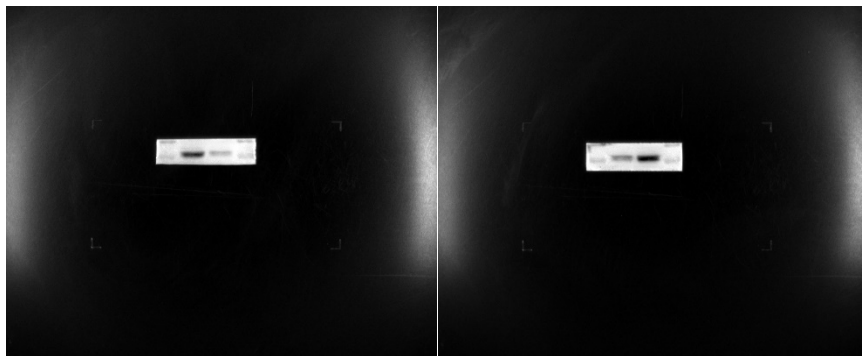

Snail 30KD

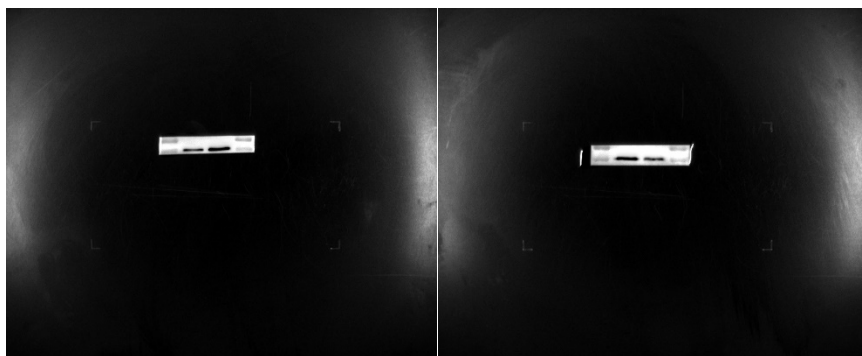

p53 57KD

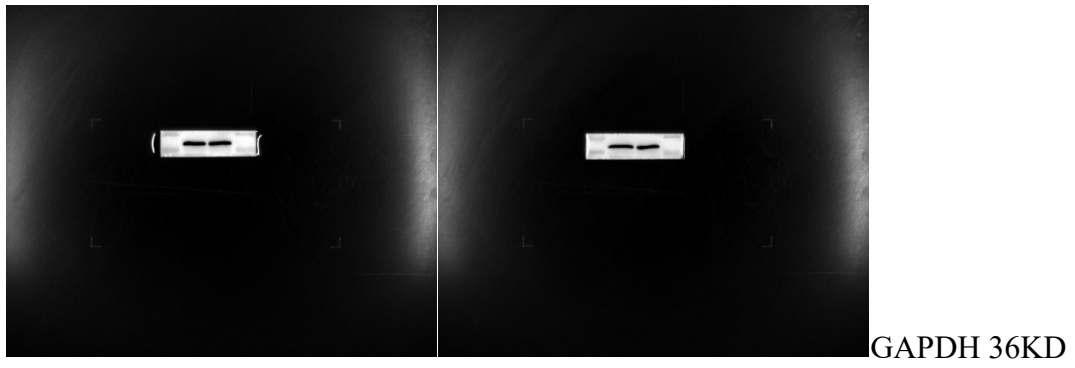

Figure 6I

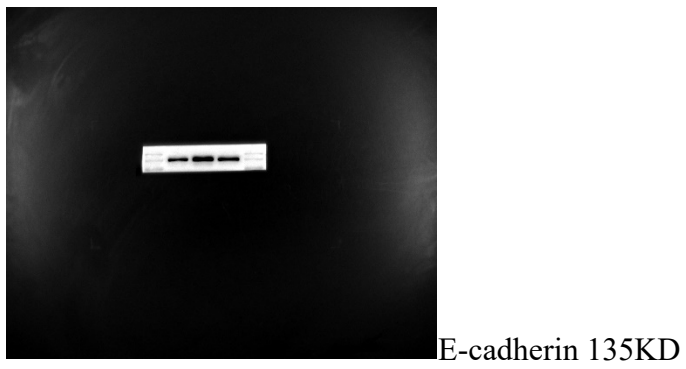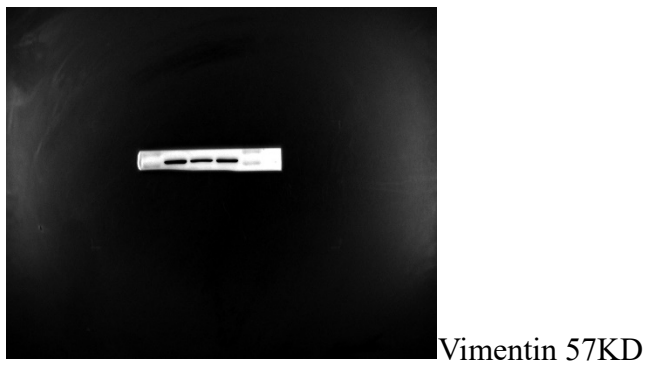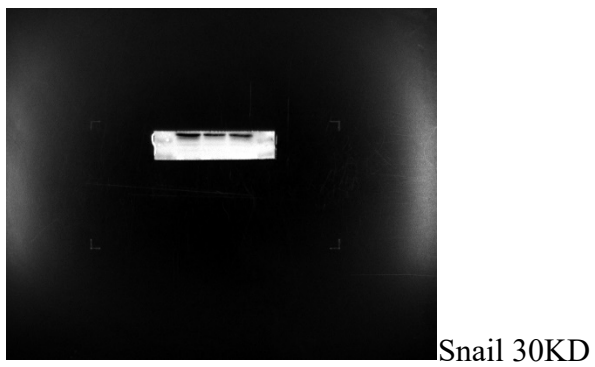

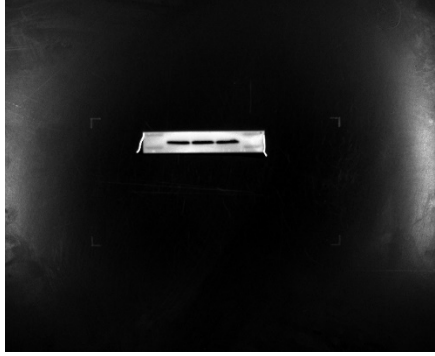

GAPDH 36KD
